# Supplementary material
Source: Springer Nature journal article supplement (https://repositorio.tec.mx/bitstream/handle/11285/613679/12864_2006_958_MOESM3_ESM.pdf)

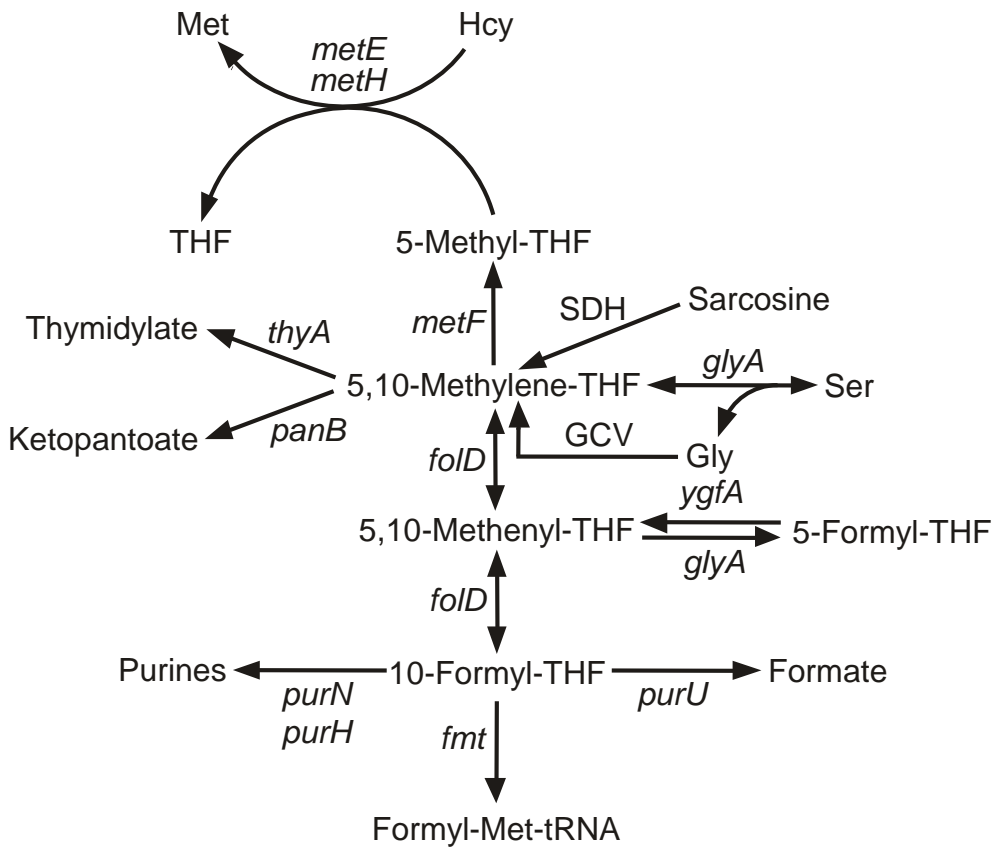

Supplement: MOESM3 [file 12864_2006_958_MOESM3_ESM.pdf]
